# Supplementary material for: Customizing STEM organogels using PET-RAFT polymerization
Source: Royal Society of Chemistry journal article supplement (doi:10.1039/d4py00874j), 2024-01-01
Supplement: d4py00874j1.pdf [file d4py00874j1.pdf]

Supplemental Information for

**Customizing STEM Organogels using PET-RAFT Polymerization**

Zaya Bowman,<sup>‡a</sup> Jared G. Baker,<sup>‡a,b</sup> Madeleine J. Hughes,<sup>a</sup> Jessica D. Nguyen,<sup>a</sup> Mathew Garcia,<sup>a</sup>  
Nahome Tamrat,<sup>a</sup> Joshua C. Worch,<sup>a,b</sup> and C. Adrian Figg<sup>\*a,b</sup>

a- Department of Chemistry, Virginia Tech, Blacksburg, Virginia 24061, United States

b- Macromolecules Innovation Institute, Virginia Tech, Blacksburg, Virginia 24061, United States

**Additional Tables and Figures**

**Table S1.** Kinetic data for the parent gel synthesis using PET-RAFT polymerization.

| Time (h) | Conversion (%) | $\text{Ln}[M]_0/[M]$ | Standard error |
|----------|----------------|----------------------|----------------|
| 0        | 0              | 0                    | 0              |
| 1        | 0              | 0                    | 0              |
| 2        | 4.67           | 0.0479               | 0.00923        |
| 3        | 16.0           | 0.175                | 0.0183         |
| 4        | 21.5           | 0.243                | 0.0511         |
| 8        | 54.0           | 0.777                | 0.0251         |
| 20       | 81.7           | 1.70                 | 0.0476         |

**Table S2.** Swelling ratios of the parent and daughter gels in DMAc performed in triplicate.

| Network | Average Dry Weight (mg) | Average Swelled Weight (mg) | Swelling Ratio (%) | Standard error (%) |
|---------|-------------------------|-----------------------------|--------------------|--------------------|
| Parent  | 98.0                    | 1430                        | 1383               | 63.64              |
| D-MA    | 63.3                    | 820                         | 1189               | 35.61              |
| D-MAX   | 50.7                    | 729                         | 1329               | 52.88              |
| D-DMA   | 48.0                    | 808                         | 1590               | 38.22              |
| D-DMAX  | 54.0                    | 719                         | 1235               | 24.30              |

**Table S3.** Swelling ratios of the parent and daughter gels in water performed in triplicate.

| Network | Average Dry Weight (mg) | Average Swelled Weight (mg) | Swelling Ratio (%) | Standard error (%) |
|---------|-------------------------|-----------------------------|--------------------|--------------------|
| Parent  | 177                     | 192                         | 8.185              | 0.4846             |
| D-MA    | 42.7                    | 58.3                        | 36.70              | 2.107              |
| D-MAX   | 44.0                    | 66.3                        | 50.25              | 3.210              |
| D-DMA   | 45.7                    | 283                         | 518.8              | 16.69              |
| D-DMAX  | 40.7                    | 189                         | 349.4              | 32.56              |

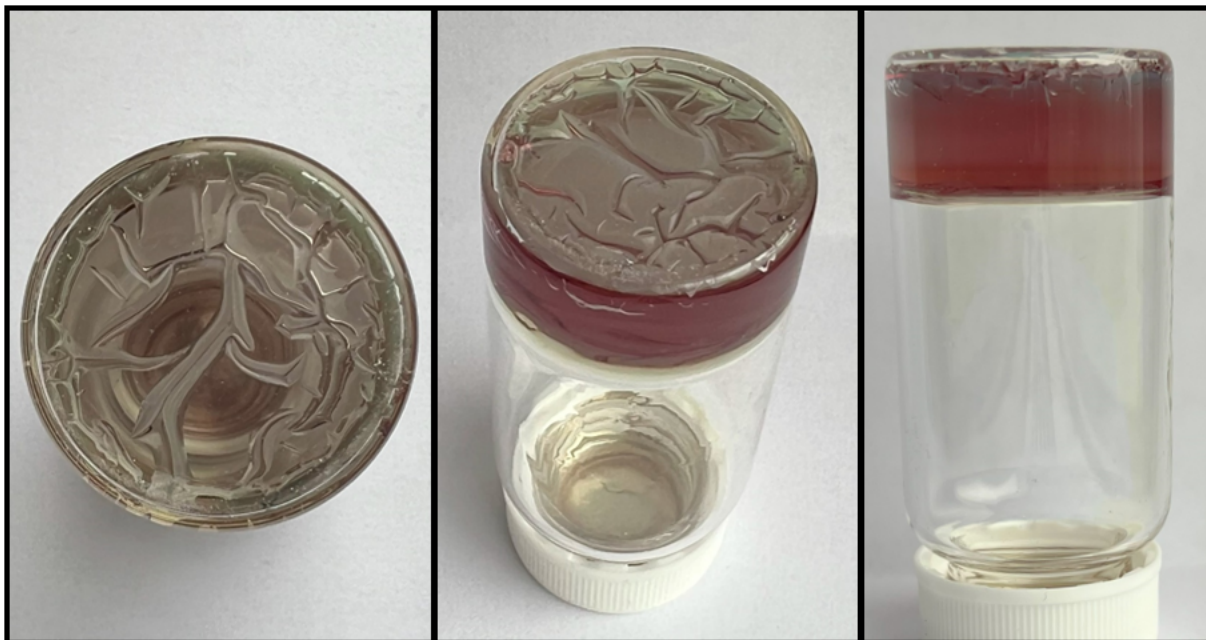

**Figure S1.** Additional images of the P(MA-*s*-DSDA) parent organogel network after synthesis.

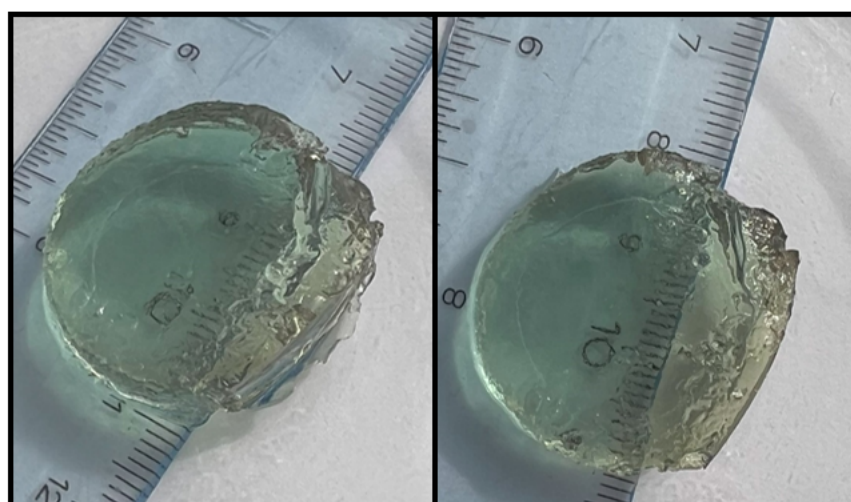

D-MA swollen in DMAc

**Figure S2.** Additional images of the daughter gel D-MA swollen in DMAc.

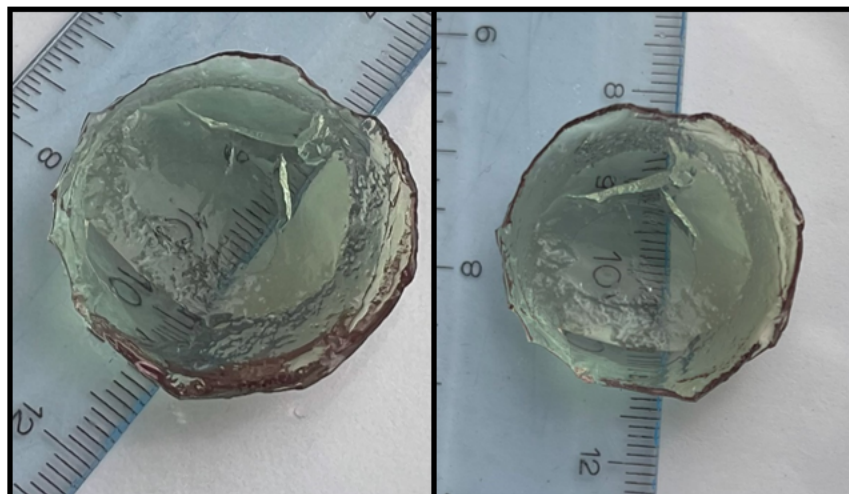

D-MAX swollen in DMAc

**Figure S3.** Additional images of the daughter gel D-MAX swollen in DMAc.

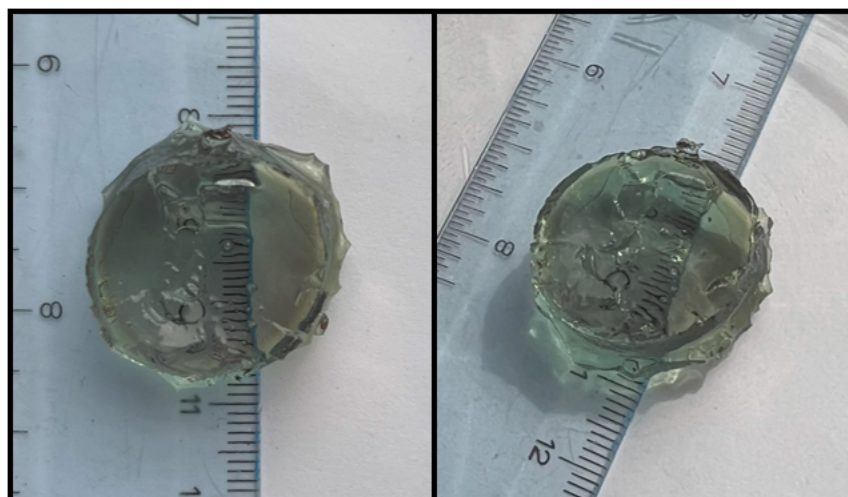

D-DMAX swollen in DMAc

**Figure S4.** Additional images of the daughter gel D-DMAX swollen in DMAc.

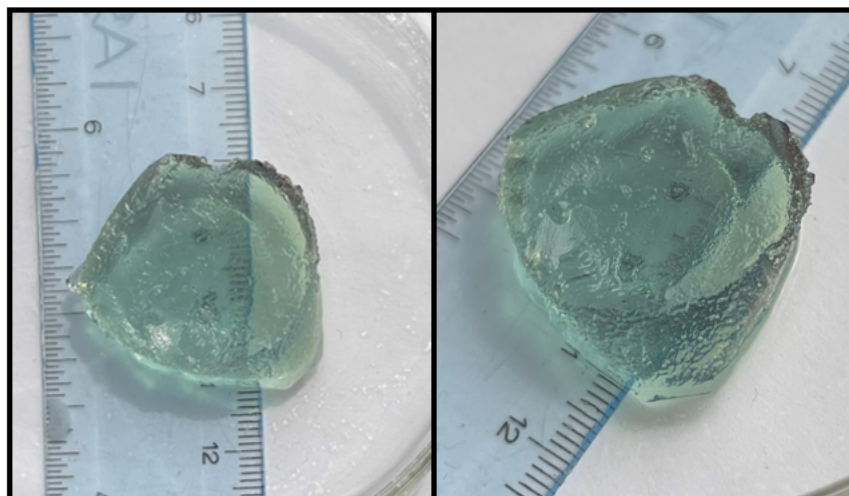

D-DMA swollen in DMAC

**Figure S5.** Additional images of the daughter gel D-DMA swollen in DMAC.

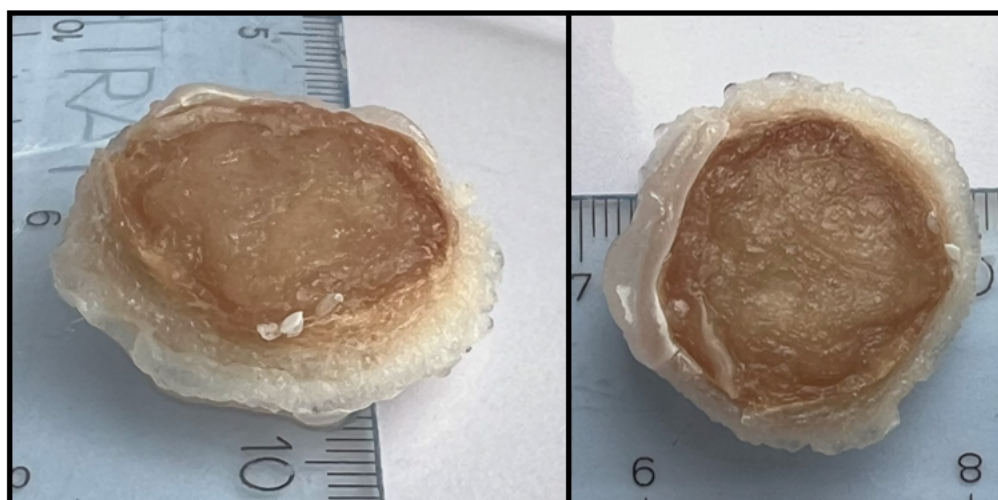

D-MA swollen in water

**Figure S6.** Additional images of the daughter gel D-MA swollen in water.

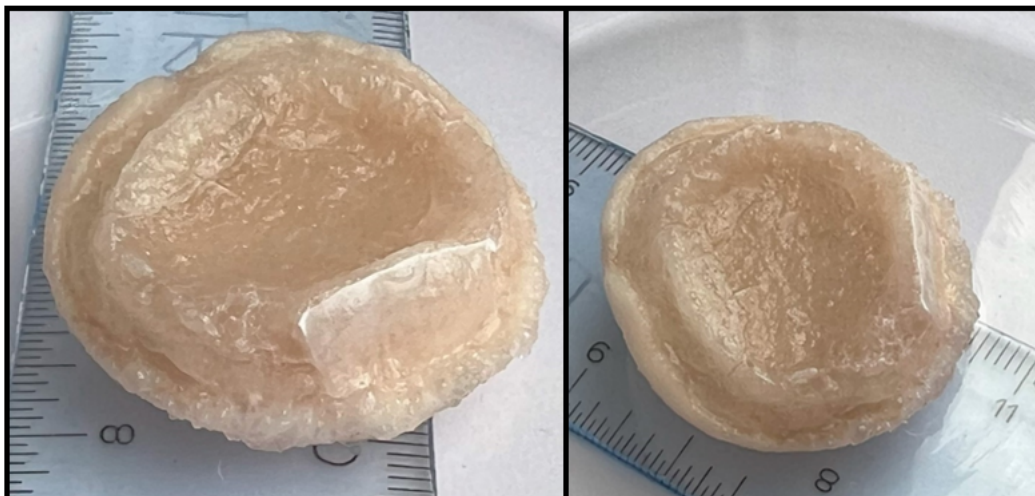

D-MAX swollen in water

**Figure S7.** Additional images of the daughter gel D-MAX swollen in water.

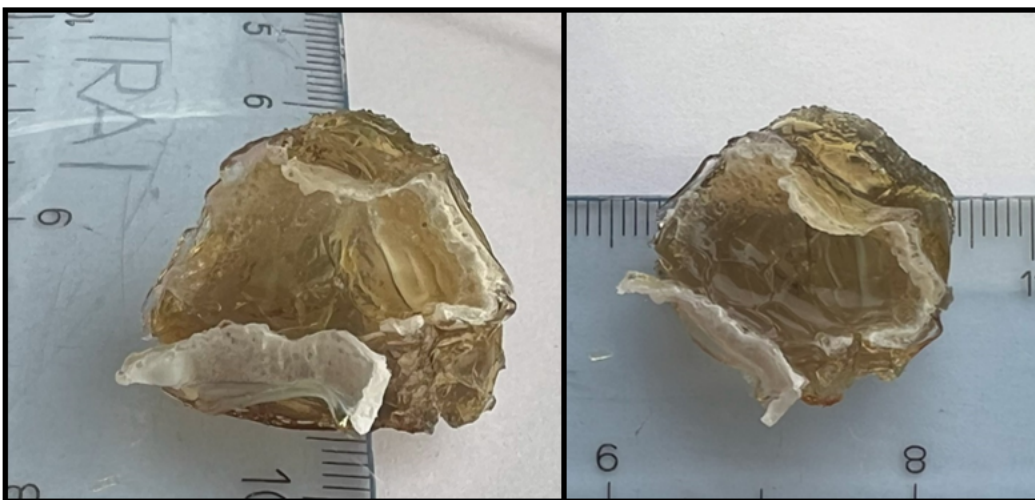

D-DMA swollen in water

**Figure S8.** Additional images of the daughter gel D-DMA swollen in water.

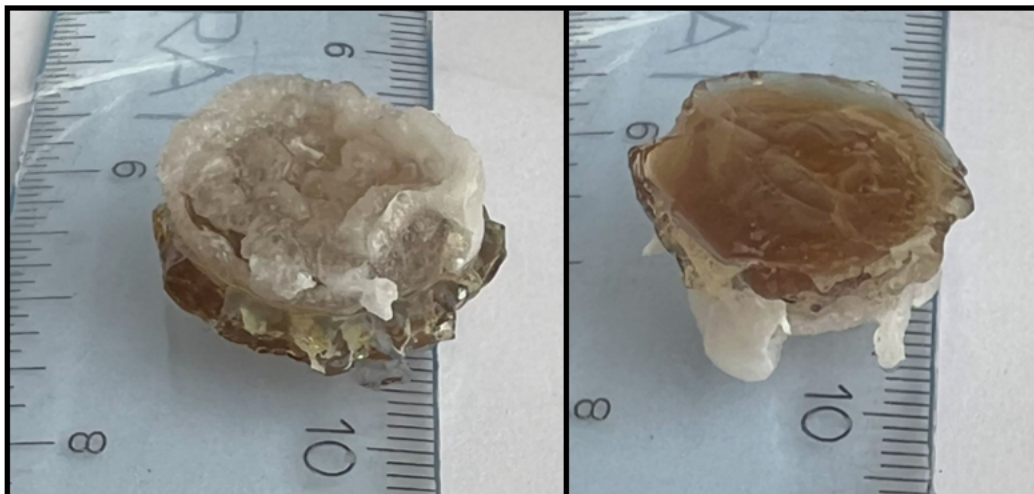

D-DMAX swollen in water

**Figure S9.** Additional images of the daughter gel D-DMAX swollen in water.

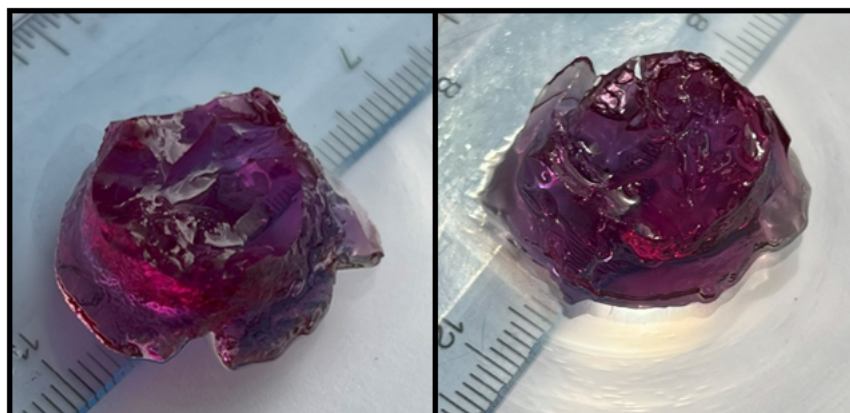

D-MA after hv

D-MAX after hv

**Figure S10.** D-MA and D-MAX after irradiation showing asymmetric expansion of the network on the bottom.

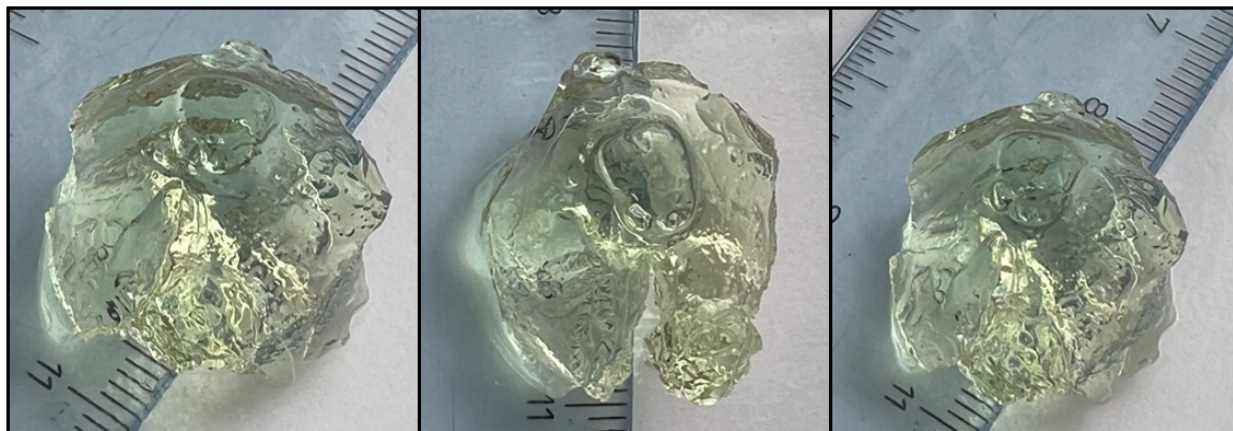

**Figure S11.** D-MA daughter gel synthesized with a checkerboard pattern on the bottom of the petri dish swollen in DMAc.

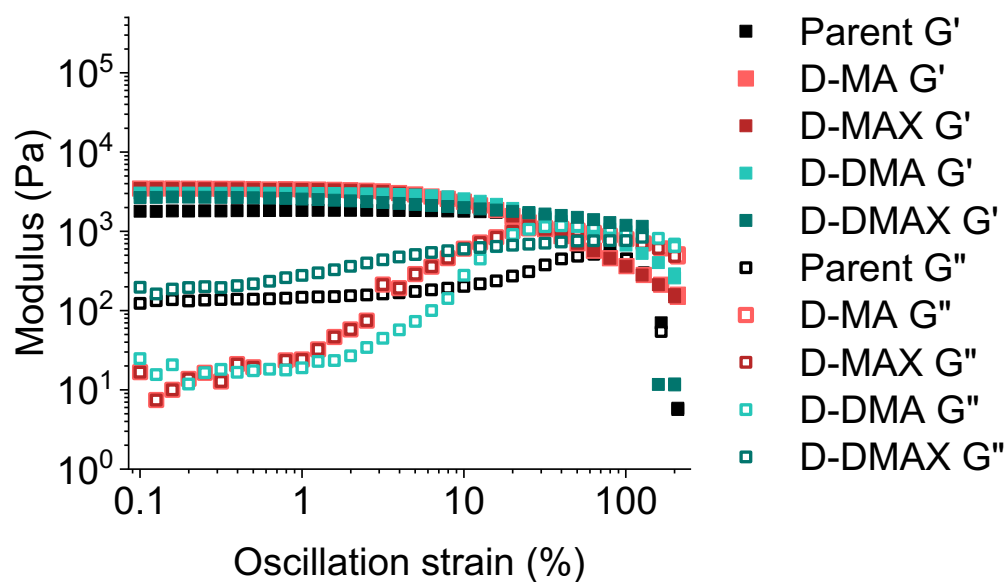

**Figure S12.** Full strain sweeps conducted on the parent and daughter gels with storage (filled squares,  $G'$ ) and loss moduli (open squares,  $G''$ ).

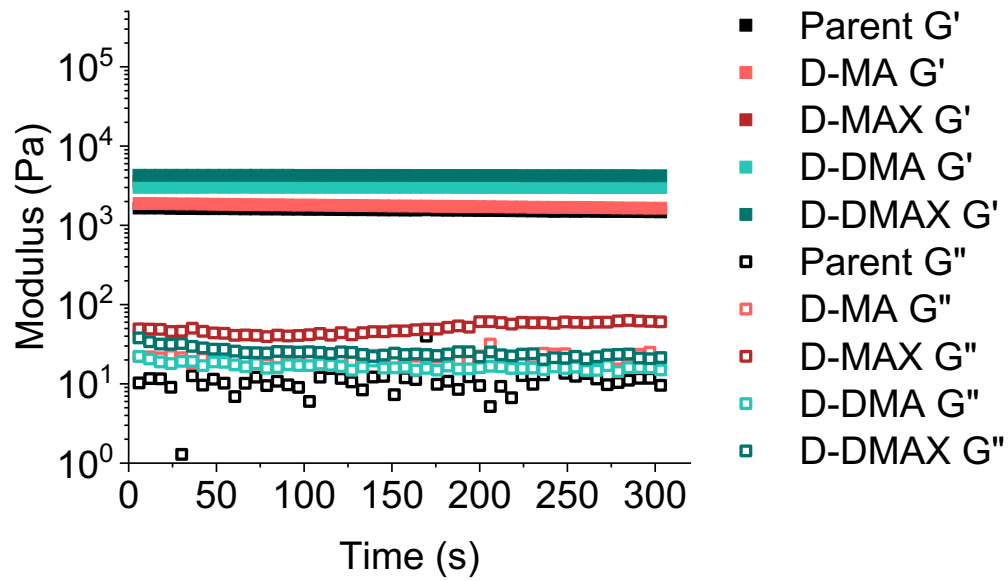

**Figure S13.** Time sweeps conducted on the parent and daughter gels with storage (filled squares,  $G'$ ) and loss moduli (open squares,  $G''$ ).

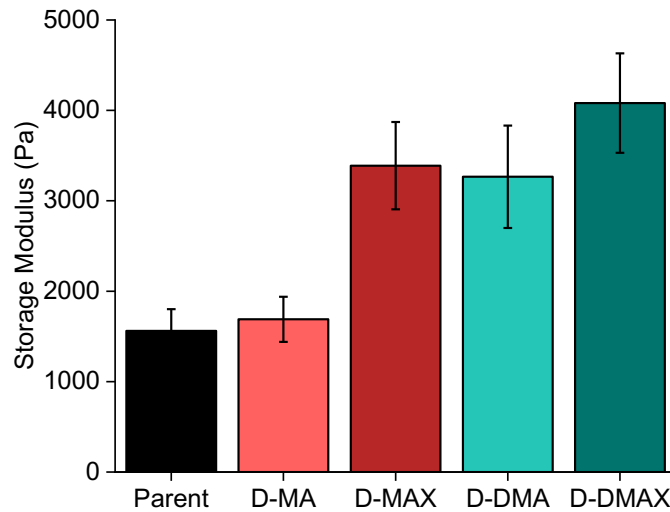

**Figure S14.** Parent and daughter gel average ( $n=3$ ) storage moduli ( $G'$ ) from time sweeps.
